# Supplementary material for: Akkermansia muciniphila and improved metabolic health during a dietary intervention in obesity: relationship with gut microbiome richness and ecology
Source: HighWire-hosted journal article supplement (doi:10.1136/gutjnl-2014-308778), 2015-06-22

**Supplementary Figure 1. *A. muciniphila* abundance distribution comparison between qPCR and QM.**

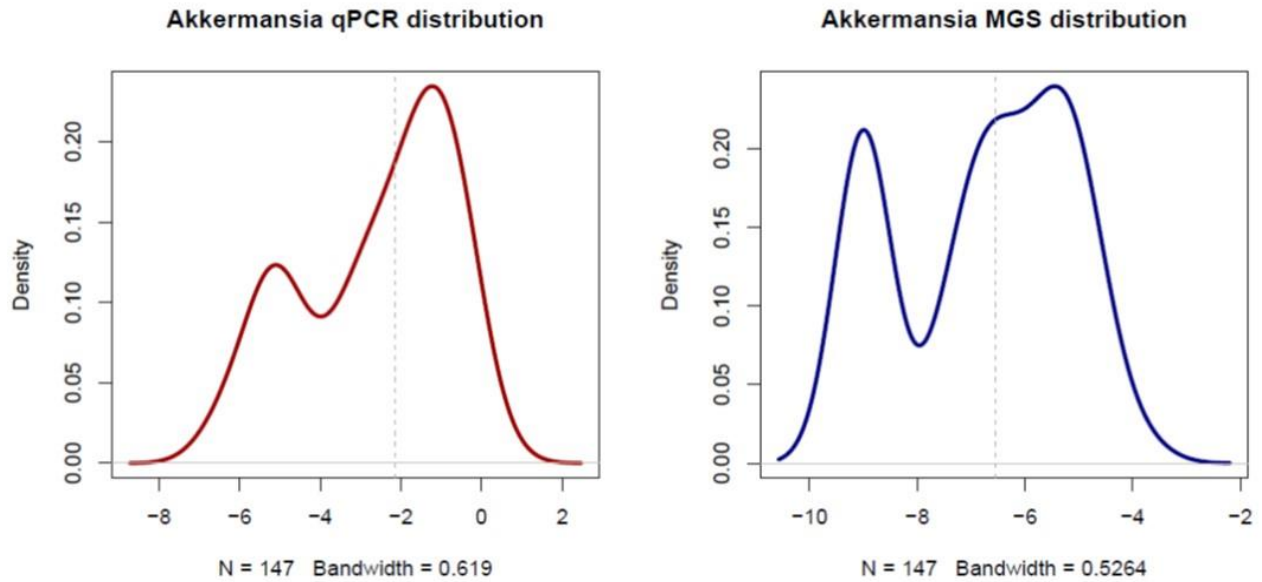

**Supplementary Figure 2. Comparison of changes in *A. muciniphila* abundance throughout dietary intervention between qPCR and QM.**

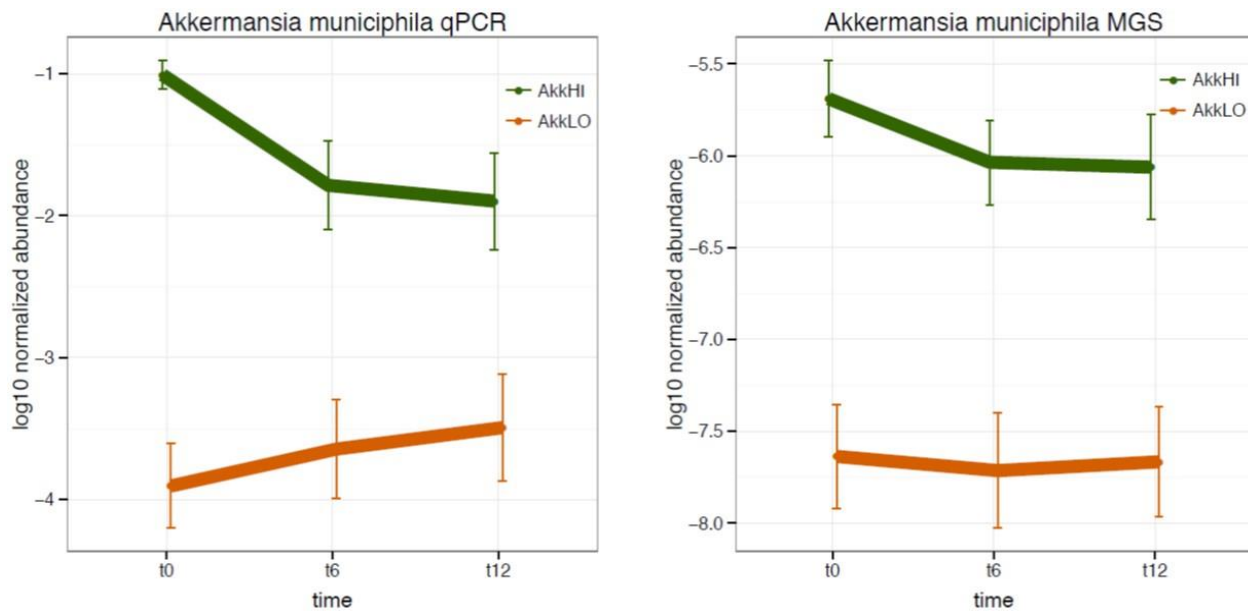

**Supplementary Figure 3. Correlation matrix depicting the baseline association between relevant variables.**

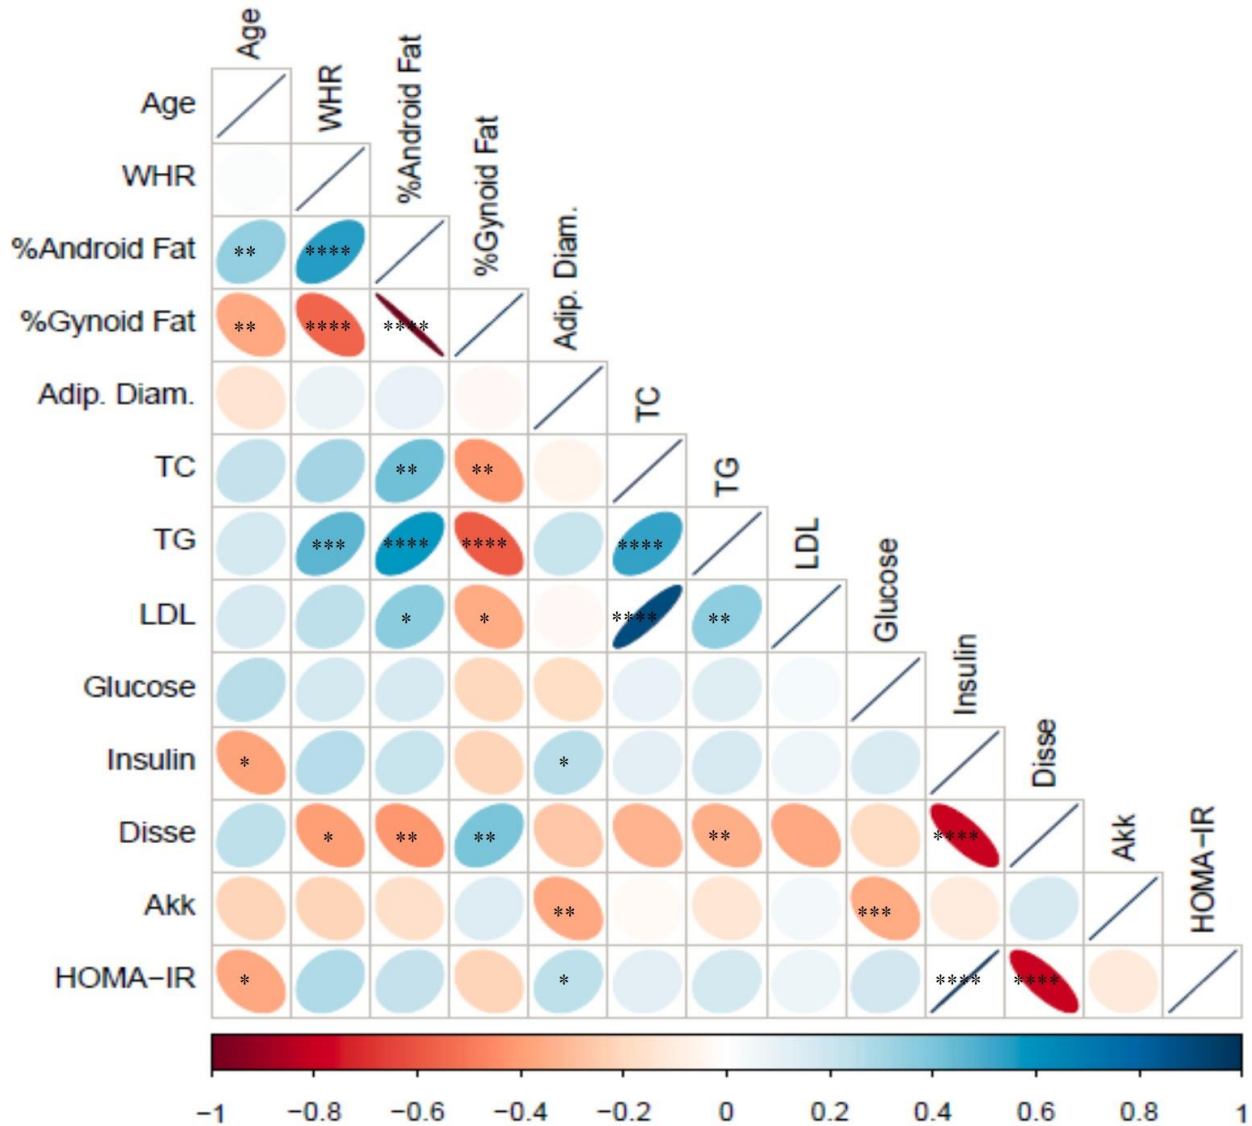

\*  $p \leq 0.05$ ; \*\*  $p \leq 0.01$ ; \*\*\*  $p \leq 0.001$ ; \*\*\*\*  $p \leq 0.0001$

**Supplementary Figure 4. Individual variations in *A. muciniphila* abundance and fasting glucose throughout the dietary intervention.**

**A:** *A. muciniphila* individual kinetics. **B:** Fasting glucose individual kinetics.

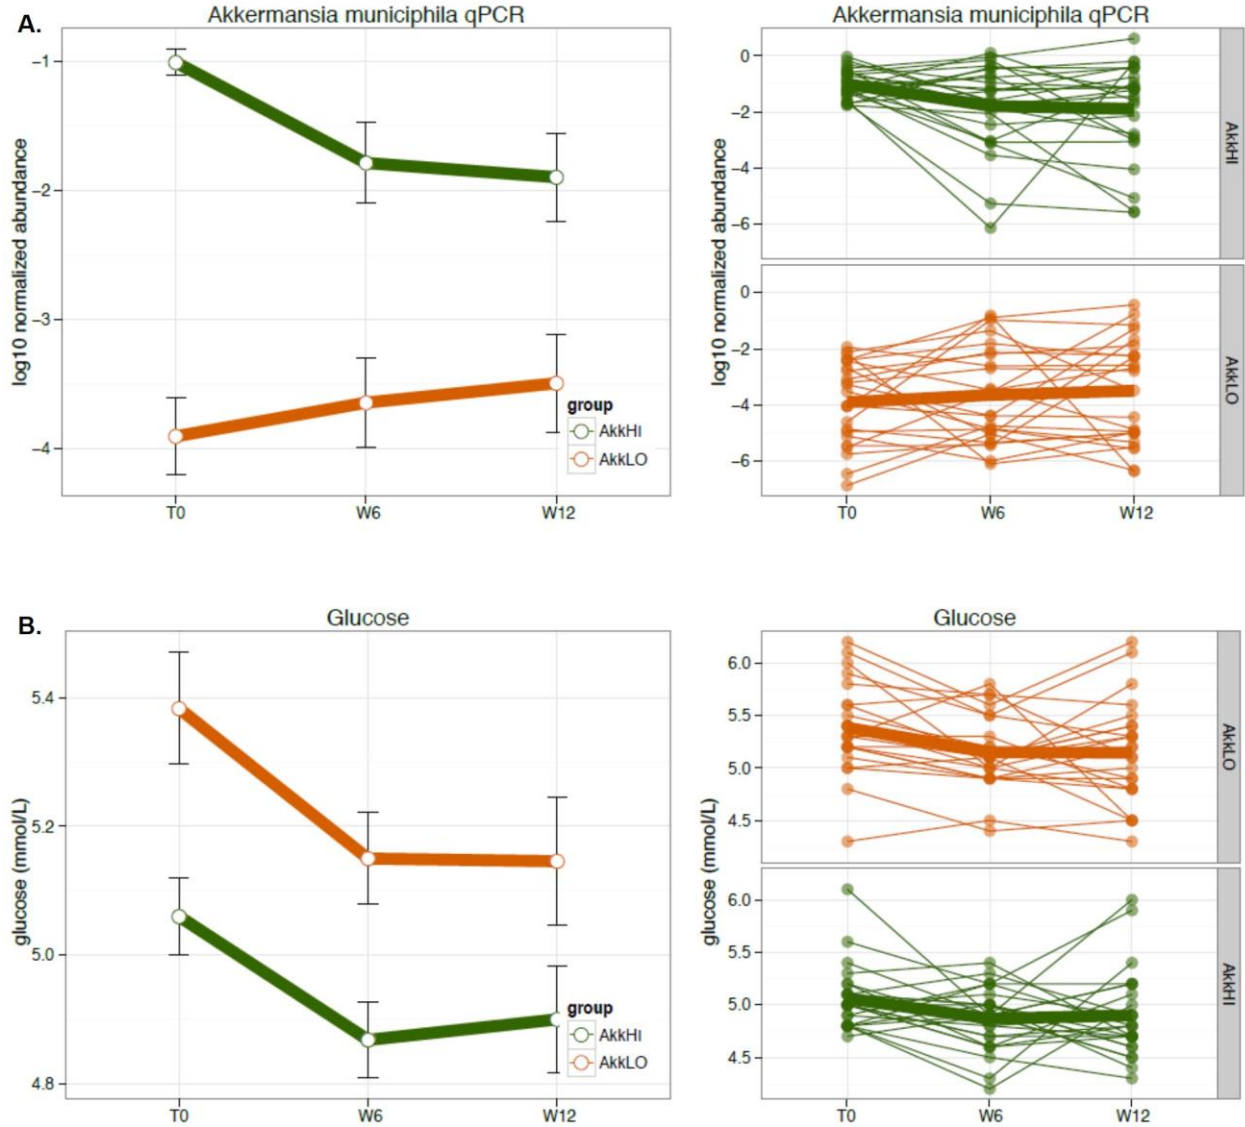

**Supplementary Figure 5. Clinical parameters that differed across *A. muciniphila* and gene count groups at different time points.**

Kruskal-Wallis for trend followed by Wilcoxon Rank Sum test for individual comparisons with Bonferroni adjustment. Akk LO = *A. muciniphila* below the median; Akk HI = *A. muciniphila* at or above the median; HGC = high gene count; LGC = low gene count. Sample sizes are Akk LO, LGC N=9; Akk HI, LGC N=9; Akk LO, HGC N=11; Akk HI, HGC N=16.

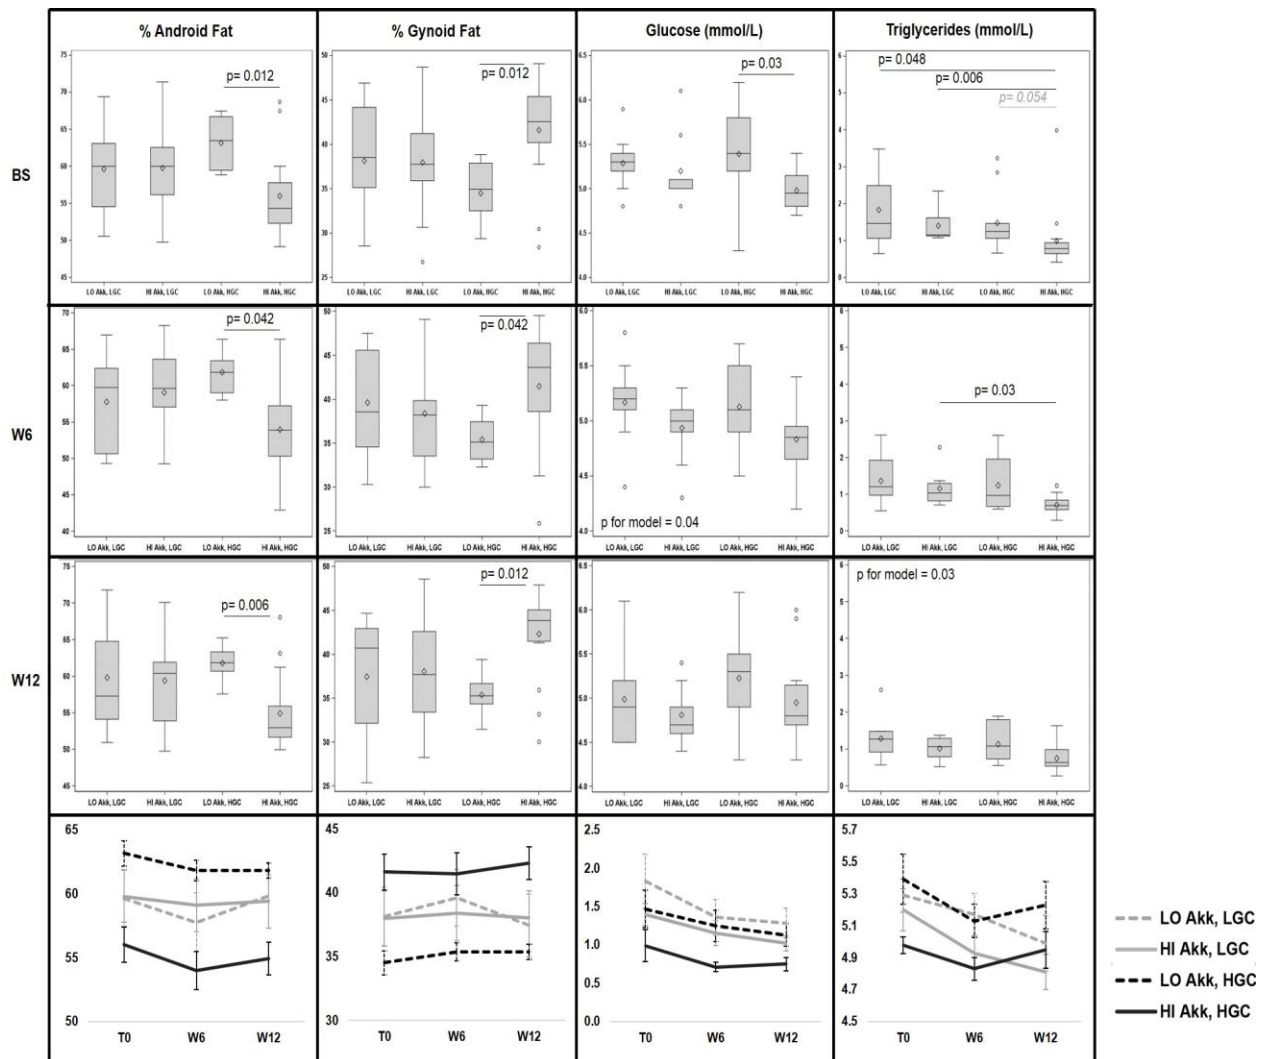

Supplement: gutjnl-2014-308778supp_figures.pdf [file gutjnl-2014-308778supp_figures.pdf]
