# Supplementary material for: Akkermansia muciniphila and improved metabolic health during a dietary intervention in obesity: relationship with gut microbiome richness and ecology
Source: HighWire-hosted journal article supplement (doi:10.1136/gutjnl-2014-308778), 2015-06-22
Supplement: gutjnl-2014-308778supp_table2.pdf [file gutjnl-2014-308778supp_table2.pdf]

**Supplementary Table 2. Comparison of NARs at T0, W6 and W12 between Akk LO and HI groups.**

| Time Point      | NAR         | Akk LO (N=15) |         | Akk HI (N=21) |         | p-value |
|-----------------|-------------|---------------|---------|---------------|---------|---------|
|                 |             | Mean          | Std Dev | Mean          | Std Dev |         |
| <b>Baseline</b> | Protein     | 100           | 0       | 97            | 10      | 24      |
|                 | Fiber       | 64            | 23      | 52            | 17      | 8       |
|                 | Vitamin A   | 55            | 32      | 52            | 25      | 82      |
|                 | Thiamine    | 81            | 18      | 85            | 16      | 45      |
|                 | Riboflavin  | 80            | 20      | 80            | 20      | 81      |
|                 | Niacin      | 99            | 4       | 91            | 16      | 21      |
|                 | Vitamin B6  | 87            | 16      | 79            | 21      | 26      |
|                 | Folic acid  | 78            | 23      | 75            | 21      | 58      |
|                 | Vitamin B12 | 95            | 9       | 93            | 18      | 45      |
|                 | Vitamin C   | 71            | 27      | 75            | 28      | 58      |
|                 | Vitamin D   | 27            | 14      | 43            | 27      | 11      |
|                 | Vitamin E   | 66            | 26      | 66            | 22      | 99      |
|                 | Iron        | 67            | 20      | 65            | 21      | 95      |
|                 | Magnesium   | 61            | 17      | 61            | 13      | 85      |
|                 | Potassium   | 79            | 17      | 81            | 18      | 80      |
| Calcium         | 70          | 28            | 76      | 24            | 50      |         |
| <b>Week 6</b>   | Protein     | 100           | 0       | 100           | 0       | 100     |
|                 | Fiber       | 82            | 15      | 73            | 24      | 37      |
|                 | Vitamin A   | 16            | 24      | 7             | 5       | 24      |
|                 | Thiamine    | 61            | 16      | 58            | 21      | 75      |
|                 | Riboflavin  | 63            | 17      | 67            | 24      | 70      |
| Niacin          | 85          | 18            | 81      | 20            | 79      |         |
| Vitamin B6      | 73          | 18            | 72      | 19            | 91      |         |

|                |             |     |    |    |    |     |
|----------------|-------------|-----|----|----|----|-----|
|                | Folic acid  | 72  | 17 | 76 | 25 | 45  |
|                | Vitamin B12 | 81  | 19 | 72 | 27 | 28  |
|                | Vitamin C   | 86  | 19 | 85 | 25 | 40  |
|                | Vitamin D   | 20  | 23 | 23 | 29 | 55  |
|                | Vitamin E   | 58  | 26 | 59 | 25 | 85  |
|                | Iron        | 49  | 15 | 48 | 25 | 36  |
|                | Magnesium   | 49  | 8  | 49 | 20 | 40  |
|                | Potassium   | 81  | 16 | 79 | 19 | 97  |
|                | Calcium     | 65  | 18 | 69 | 28 | 40  |
| <b>Week 12</b> | Protein     | 100 | 1  | 99 | 3  | 79  |
|                | Fiber       | 73  | 17 | 62 | 26 | 17  |
|                | Vitamin A   | 43  | 27 | 35 | 16 | 61  |
|                | Thiamine    | 82  | 20 | 90 | 13 | 38  |
|                | Riboflavin  | 84  | 16 | 86 | 17 | 32  |
|                | Niacin      | 95  | 10 | 97 | 9  | 52  |
|                | Vitamin B6  | 85  | 21 | 88 | 15 | 84  |
|                | Folic acid  | 87  | 21 | 81 | 21 | 51  |
|                | Vitamin B12 | 86  | 24 | 93 | 13 | 61  |
|                | Vitamin C   | 86  | 23 | 81 | 20 | 39  |
|                | Vitamin D   | 34  | 30 | 27 | 16 | 100 |
|                | Vitamin E   | 59  | 27 | 57 | 13 | 50  |
|                | Iron        | 64  | 17 | 62 | 19 | 54  |
|                | Magnesium   | 61  | 9  | 62 | 17 | 97  |
|                | Potassium   | 89  | 14 | 82 | 17 | 31  |
|                | Calcium     | 75  | 22 | 82 | 22 | 32  |

Wilcoxon rank sum test, mean (SD) are shown. The NAR is the mean intake of a nutrient divided by the French Recommended Dietary Allowance, and truncated at 100.
